# Supplementary material
Source: PubMed Central journal article supplement (PMC4442704)

Supplemental Data Figure S1

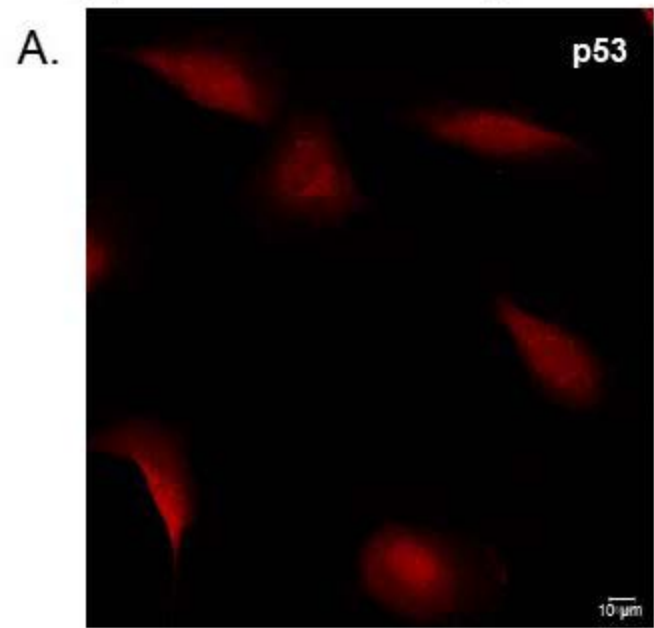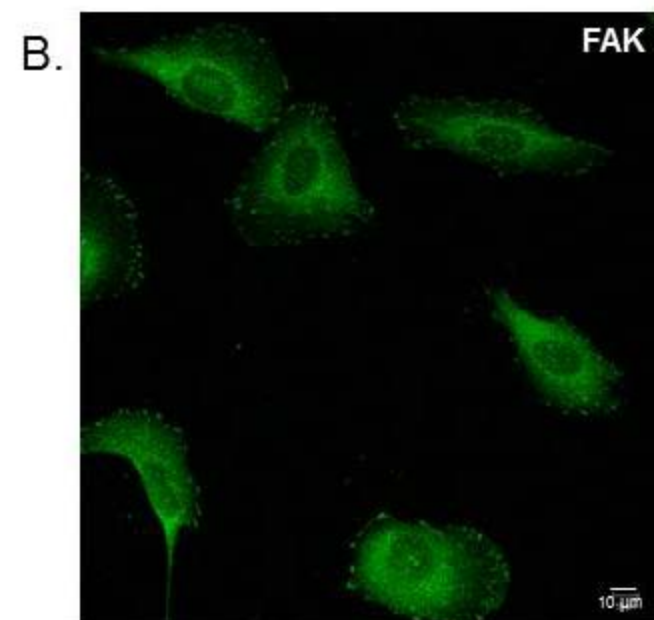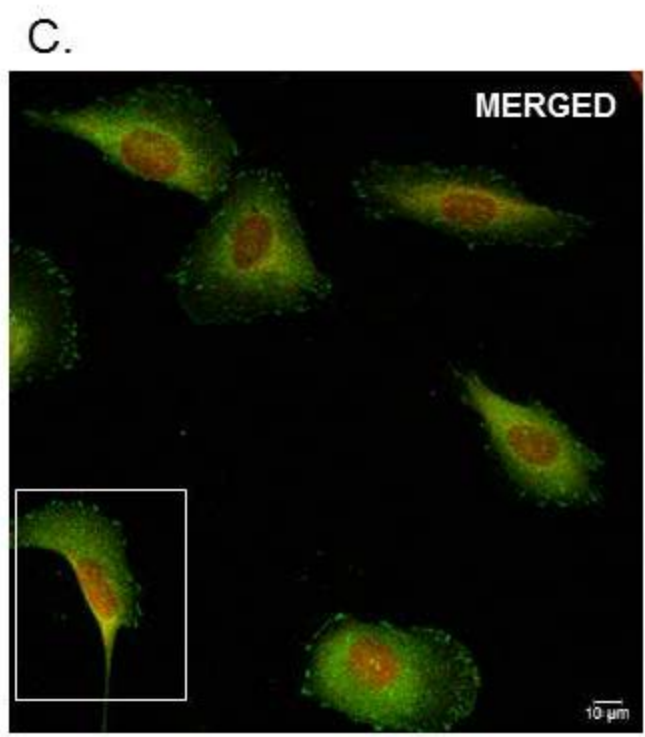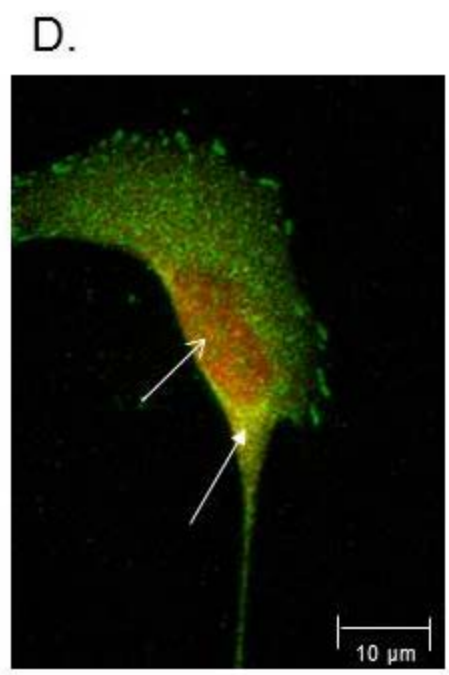

Supplement: NIHMS672263-supplement-1.pdf [file NIHMS672263-supplement-1.pdf]

# Supplemental Data Figure S2

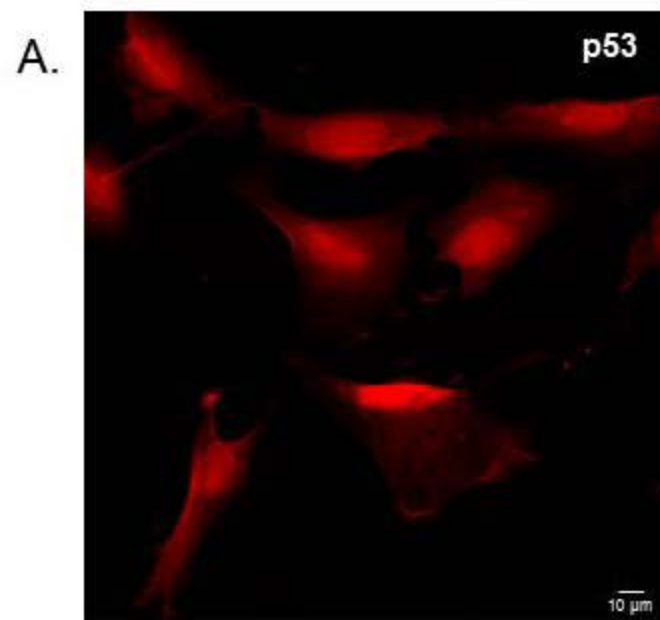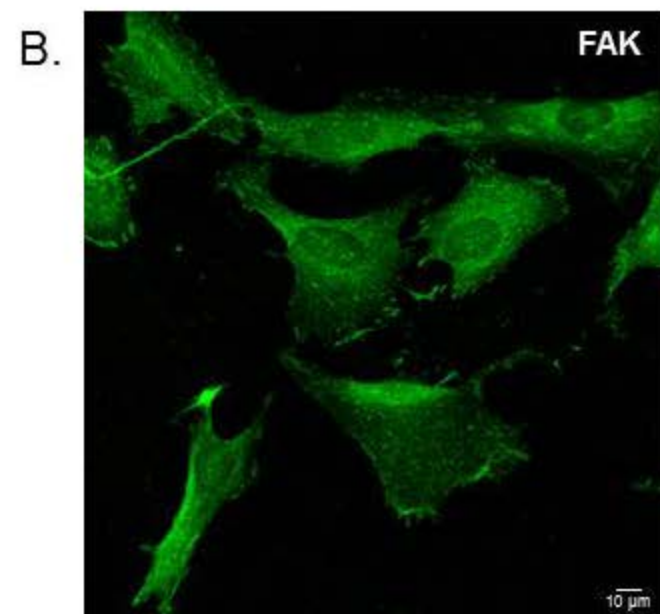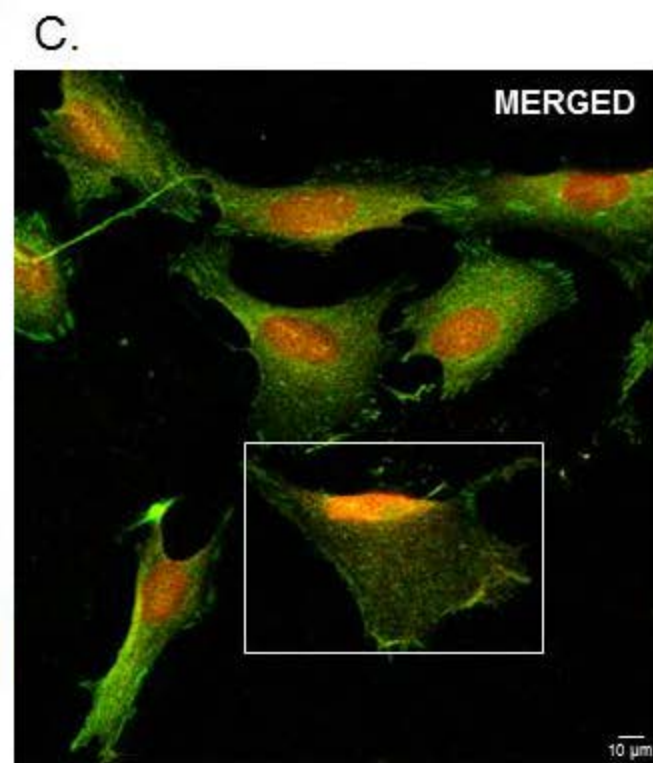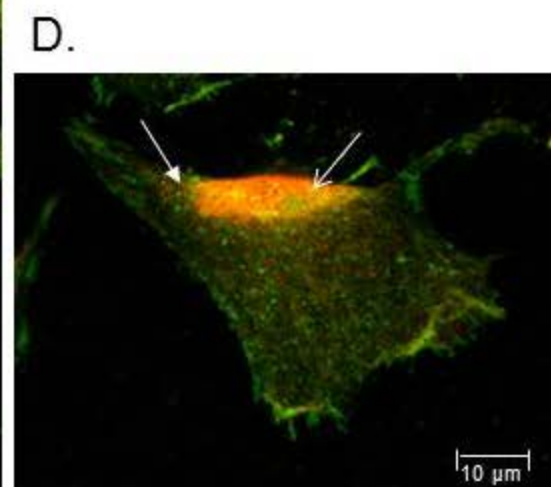

Supplement: NIHMS672263-supplement-2.pdf [file NIHMS672263-supplement-2.pdf]

# Supplemental Data Figure S3

A.

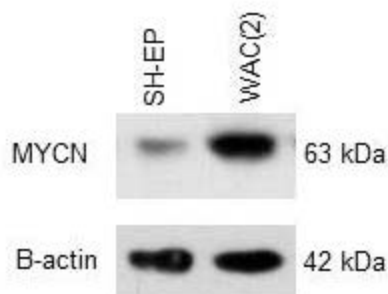

B.

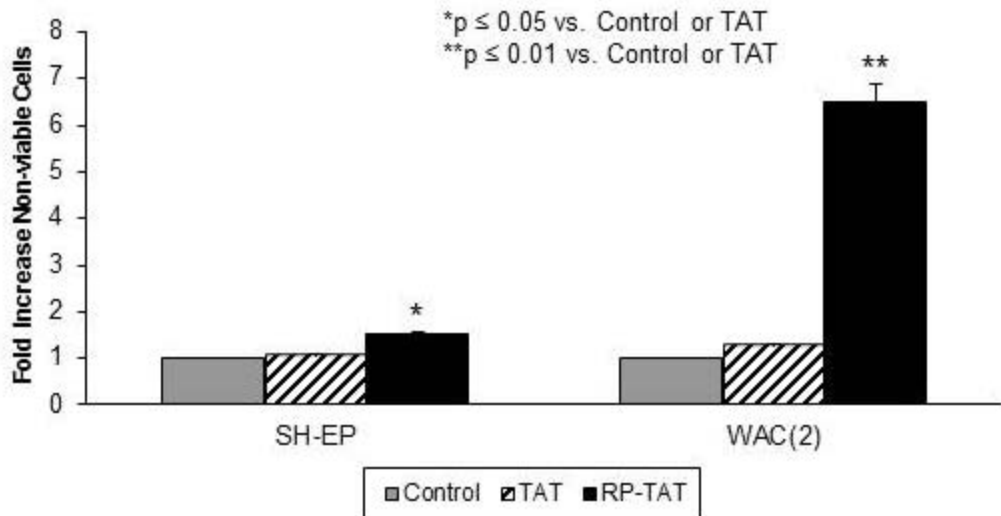

Supplement: NIHMS672263-supplement-3.pdf [file NIHMS672263-supplement-3.pdf]
